# Supplementary material for: Ru(ii)-cornered coordination cage that senses guest inclusion by color change
Source: Royal Society of Chemistry journal article supplement (doi:10.1039/b712529a), 2007-01-01
Supplement: b712529a.pdf [file b712529a.pdf]

## **Ru(II)-cornered coordination cage that senses guest inclusion by color change**

Ken-ichi Yamashita, Masaki Kawano and Makoto Fujita\*

### **Contents;**

General.

Preparation of Ru-cage **1**.

Guest encapsulation experiment.

Physical properties of **1**⊃(**6**)<sub>4</sub>

**Figure S1.** CSI-MS spectrum of **1**.

**Table 1.** Crystal data and structure refinement for **1**·(H<sub>2</sub>O)<sub>m</sub>.

**Figure S2.** ORTEP views (30% probability level) of **1**·(H<sub>2</sub>O)<sub>m</sub>.

**Table 2.** Crystal data and structure refinement for [**1**·(**6**)<sub>4</sub>]·(**5**)·(H<sub>2</sub>O)<sub>m</sub>.

**Figure S3.** ORTEP views (30% probability level) of [**1**·(**6**)<sub>4</sub>]·(**5**)·(H<sub>2</sub>O)<sub>m</sub>.

**Figure S4.** UV-Vis spectra of Ru(II)-cage **1** encapsulating adamantane derivatives.

## General

All the chemicals were of reagent grades and used without any further purification. D<sub>2</sub>O was acquired from Cambridge Isotopic Laboratories.

All NMR spectral data were recorded on Bruker DRX-500 (500 MHz) spectrometer or Bruker AXL-500 (500 MHz) spectrometer. These data were collected at ambient temperature (300 K) unless otherwise noted and the chemical shift values reported here are with respect to external TMS (CDCl<sub>3</sub> solution) standard. CSI-MS (Coldspray ionization mass spectroscopy) data were measured on a four-sector (BE/BE) tandem mass spectrometer (JMS-700C, JEOL) equipped with the CSI source. X-ray diffraction data were measured on a Bruker APEX-II CCD diffractometer equipped with a micro-focused rotating anode system combined with an X-ray focusing mirror (MoK $\alpha$  radiation,  $\lambda = 0.71073 \text{ \AA}$ ) with a cryostat system equipped with a N<sub>2</sub> generator (XR-HR 10K, Japan Thermal Eng. Co., Ltd.). Structures were solved by direct methods (SHELXS 97) and refined by full-matrix least-squares calculations on F<sup>2</sup> (SHELXL-97) using the SHELX-TL program package. IR measurements were carried out as KBr pellets using a DIGILAB Scimitar FTS2000 instrument. UV-Vis spectral data were recorded on SHIMADZU UV-3150 spectrometer. Melting points were determined on a Yanaco MF-500 V melting point apparatus.

Preparation of Ru(II)-cage **1**: To a aqueous solution (2 mL) of [Ru([12]aneS<sub>4</sub>)(dmsO)(H<sub>2</sub>O)](NO<sub>3</sub>)<sub>2</sub> (67.4 mg, 0.12 mmol), 2,4,6-tris(4-pyridyl)-1,3,5-triazine (24.5 mg, 0.08 mmol) was suspended, and the resulting mixture was stirred at 100 °C for 2 h. After removal of precipitate by filtration, excess amount of THF was added to the resulting red solution, and the orange precipitate was corrected by filtration, and dried under vacuum to give **1** as orange powder (79.9 mg, 0.019 mmol, 98%). <sup>1</sup>H NMR (500 MHz, D<sub>2</sub>O, r.t.)  $\delta$  (ppm) = 9.01 (br, PyH $_{\alpha}$ ), 8.86 (br, PyH $_{\alpha}$ ), 8.53 (br, PyH $_{\beta}$ ), 8.35 (br, PyH $_{\beta}$ ), 4.46 (br, [12]aneS<sub>4</sub>), 4.07 (d,  $J = 14.3 \text{ Hz}$ , [12]aneS<sub>4</sub>), 3.87 (d,  $J = 13.3 \text{ Hz}$ , [12]aneS<sub>4</sub>), 3.58-3.16 (m, [12]aneS<sub>4</sub>) 3.02 (br, [12]aneS<sub>4</sub>), 2.63 (d, [12]aneS<sub>4</sub>). <sup>13</sup>C NMR (125 MHz, D<sub>2</sub>O, r.t.)  $\delta$  (ppm) = 170.5 (Cq), 169.7 (Cq), 156.2 (CH $_{\alpha}$ ), 155.4 (CH $_{\alpha}$ ), 154.5 (CH $_{\alpha}$ ), 143.8 (Cq), 125.5 (CH $_{\beta}$ ), 125.3 (CH $_{\beta}$ ), 125.0 (CH $_{\beta}$ ), 43.1 (CH<sub>2</sub>), 42.6 (CH<sub>2</sub>), 39.5 (CH<sub>2</sub>), 36.2 (CH<sub>2</sub>), 33.8

(CH<sub>2</sub>), 33.8 (CH<sub>2</sub>). IR (KBr, cm<sup>-1</sup>): 3435 (br), 2968, 2916, 1626, 1572, 1518, 1382, 805. m.p.: ~210 °C (decomposed). CSI-MS (H<sub>2</sub>O-DMSO): *m/z* = 451.7 [1-(NO<sub>3</sub><sup>-</sup>)<sub>10</sub>+(dmsO)<sub>14</sub>]<sup>10+</sup>, 459.8 [1-(NO<sub>3</sub><sup>-</sup>)<sub>10</sub>+(dmsO)<sub>15</sub>]<sup>10+</sup>, 467.4 [1-(NO<sub>3</sub><sup>-</sup>)<sub>10</sub>+(dmsO)<sub>16</sub>]<sup>10+</sup>, 475.4 [1-(NO<sub>3</sub><sup>-</sup>)<sub>10</sub>+(dmsO)<sub>17</sub>]<sup>10+</sup>, 483.0 [1-(NO<sub>3</sub><sup>-</sup>)<sub>9</sub>+(dmsO)<sub>11</sub>]<sup>9+</sup>, 491.4 [1-(NO<sub>3</sub><sup>-</sup>)<sub>9</sub>+(dmsO)<sub>12</sub>]<sup>9+</sup>, 500.2 [1-(NO<sub>3</sub><sup>-</sup>)<sub>9</sub>+(dmsO)<sub>13</sub>]<sup>9+</sup>, 509.0 [1-(NO<sub>3</sub><sup>-</sup>)<sub>9</sub>+(dmsO)<sub>14</sub>]<sup>9+</sup>, 517.8 [1-(NO<sub>3</sub><sup>-</sup>)<sub>9</sub>+(dmsO)<sub>15</sub>]<sup>9+</sup>, 521.6 [1-(NO<sub>3</sub><sup>-</sup>)<sub>8</sub>+(dmsO)<sub>7</sub>]<sup>8+</sup>, 531.7 [1-(NO<sub>3</sub><sup>-</sup>)<sub>8</sub>+(dmsO)<sub>8</sub>]<sup>8+</sup>, 541.2 [1-(NO<sub>3</sub><sup>-</sup>)<sub>8</sub>+(dmsO)<sub>9</sub>]<sup>8+</sup>, 551.3 [1-(NO<sub>3</sub><sup>-</sup>)<sub>8</sub>+(dmsO)<sub>10</sub>]<sup>8+</sup>, 561.1 [1-(NO<sub>3</sub><sup>-</sup>)<sub>8</sub>+(dmsO)<sub>11</sub>]<sup>8+</sup>, 570.7 [1-(NO<sub>3</sub><sup>-</sup>)<sub>8</sub>+(dmsO)<sub>12</sub>]<sup>8+</sup> and [1-(NO<sub>3</sub><sup>-</sup>)<sub>7</sub>+(dmsO)<sub>5</sub>]<sup>7+</sup>, 582.7 [1-(NO<sub>3</sub><sup>-</sup>)<sub>7</sub>+(dmsO)<sub>6</sub>]<sup>7+</sup>, 593.7 [1-(NO<sub>3</sub><sup>-</sup>)<sub>7</sub>+(dmsO)<sub>7</sub>]<sup>7+</sup>, 605.0 [1-(NO<sub>3</sub><sup>-</sup>)<sub>7</sub>+(dmsO)<sub>8</sub>]<sup>7+</sup>, 616.3 [1-(NO<sub>3</sub><sup>-</sup>)<sub>7</sub>+(dmsO)<sub>9</sub>]<sup>7+</sup>, 638.7 [1-(NO<sub>3</sub><sup>-</sup>)<sub>6</sub>+(dmsO)<sub>2</sub>]<sup>6+</sup>, 650.9 [1-(NO<sub>3</sub><sup>-</sup>)<sub>6</sub>+(dmsO)<sub>3</sub>]<sup>6+</sup>, 664.1 [1-(NO<sub>3</sub><sup>-</sup>)<sub>6</sub>+(dmsO)<sub>4</sub>]<sup>6+</sup>, 677.2 [1-(NO<sub>3</sub><sup>-</sup>)<sub>6</sub>+(dmsO)<sub>5</sub>]<sup>6+</sup>, 746.4 [1-(NO<sub>3</sub><sup>-</sup>)<sub>5</sub>]<sup>5+</sup>, 762.4 [1-(NO<sub>3</sub><sup>-</sup>)<sub>5</sub>+dmsO]<sup>5+</sup>, 778.0 [1-(NO<sub>3</sub><sup>-</sup>)<sub>5</sub>+(dmsO)<sub>2</sub>]<sup>5+</sup>, 794.3 [1-(NO<sub>3</sub><sup>-</sup>)<sub>5</sub>+(dmsO)<sub>3</sub>]<sup>5+</sup>, 948.9 [1-(NO<sub>3</sub><sup>-</sup>)<sub>4</sub>]<sup>4+</sup>. Elemental analysis: calcd. for C<sub>120</sub>H<sub>144</sub>N<sub>36</sub>O<sub>36</sub>Ru<sub>6</sub>S<sub>24</sub>·26H<sub>2</sub>O: C, 31.95; H, 4.38; N, 11.18; found: C, 32.18; H, 4.16; N, 10.97.

#### Guest encapsulation experiment

Excess amount of guest molecule (ca. 10 equiv.) was suspended to an aqueous solution of **1**, and the resulting solution was stirred at room temperature for 30 min.

Physical properties of **1**⊃(**6**)<sub>4</sub>: <sup>1</sup>H NMR (500 MHz, D<sub>2</sub>O, r.t.) δ(ppm) = 9.26 (br, PyH<sub>α</sub>), 9.11 (br, PyH<sub>α</sub>), 9.07 (br, PyH<sub>α</sub>), 8.73 (br, PyH<sub>β</sub>), 8.63 (br, PyH<sub>β</sub>), 4.47 (br, [12]aneS<sub>4</sub>), 4.11 (d, *J* = 13.2 Hz, [12]aneS<sub>4</sub>), 3.89 (d, *J* = 13.7 Hz, [12]aneS<sub>4</sub>), 3.57-3.15 (m, [12]aneS<sub>4</sub>), 3.05 (br, [12]aneS<sub>4</sub>), 2.60 (d, [12]aneS<sub>4</sub>), 1.36 (br, **6**), 0.44 (br, **6**), 0.30 (br, **6**), -0.36 (br, **6**). <sup>13</sup>C NMR (125 MHz, D<sub>2</sub>O, r.t.) δ(ppm) = 169.7 (Cq), 169.3 (Cq), 156.6 (CH<sub>α</sub>), 155.6 (CH<sub>α</sub>), 154.7 (CH<sub>α</sub>), 142.8 (Cq), 142.6 (Cq), 125.5 (CH<sub>β</sub>), 125.2 (CH<sub>β</sub>), 125.0 (CH<sub>β</sub>), 43.8 (**6**, CH<sub>2</sub>), 42.9 (CH<sub>2</sub>), 42.4 (CH<sub>2</sub>), 39.2 (CH<sub>2</sub>), 36.3 (CH<sub>2</sub>), 35.2 (**6**, CH<sub>2</sub>), 33.7 (CH<sub>2</sub>), 32.3 (CH<sub>2</sub>), 29.9 (**6**, CH).

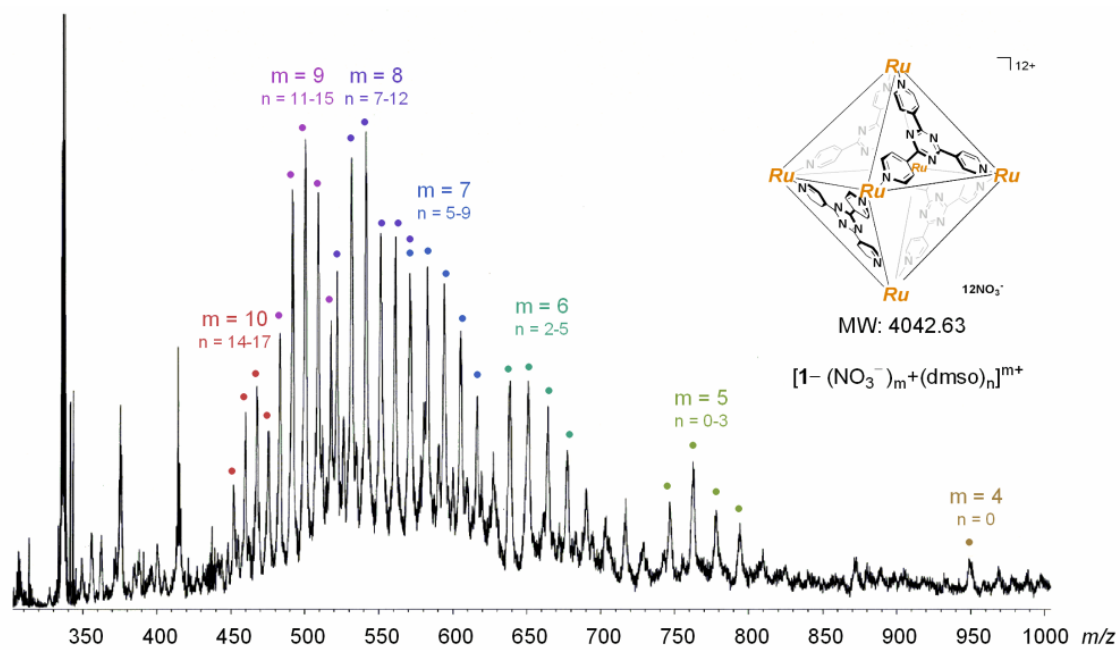

**Figure S1.** CSI-MS spectrum of **1**.

**Table 1.** Crystal data and structure refinement for  $\mathbf{1} \cdot (\text{H}_2\text{O})_m$ .

|                                   |                                           |                              |
|-----------------------------------|-------------------------------------------|------------------------------|
| Identification code               | cage1                                     |                              |
| Empirical formula                 | C120 H 281 N31 O91.50 Ru6 S24             |                              |
| Formula weight                    | 4990.59                                   |                              |
| Temperature                       | 80(2) K                                   |                              |
| Wavelength                        | 0.71073 Å                                 |                              |
| Crystal system                    | Triclinic                                 |                              |
| Space group                       | <i>P</i> -1                               |                              |
| Unit cell dimensions              | $a = 28.043(5)$ Å                         | $\alpha = 81.553(2)^\circ$ . |
|                                   | $b = 28.463(5)$ Å                         | $\beta = 70.715(2)^\circ$ .  |
|                                   | $c = 37.746(6)$ Å                         | $\gamma = 72.193(2)^\circ$ . |
| Volume                            | 27040(8) Å <sup>3</sup>                   |                              |
| Z                                 | 4                                         |                              |
| Density (calculated)              | 1.228 Mg/m <sup>3</sup>                   |                              |
| Absorption coefficient            | 0.587 mm <sup>-1</sup>                    |                              |
| F(000)                            | 10392                                     |                              |
| Crystal size                      | 0.15 x 0.11 x 0.04 mm <sup>3</sup>        |                              |
| Theta range for data collection   | 1.53 to 27.90°.                           |                              |
| Index ranges                      | -36 ≤ h ≤ 36, -37 ≤ k ≤ 37, -48 ≤ l ≤ 49  |                              |
| Reflections collected             | 315324                                    |                              |
| Independent reflections           | 125585 [R(int) = 0.0741]                  |                              |
| Completeness to theta = 27.90°    | 97.1 %                                    |                              |
| Absorption correction             | Semi-empirical                            |                              |
| Max. and min. transmission        | 0.9769 and 0.9172                         |                              |
| Refinement method                 | userblock least-squares on F <sup>2</sup> |                              |
| Data / restraints / parameters    | 125585 / 5351 / 5055                      |                              |
| Goodness-of-fit on F <sup>2</sup> | 1.218                                     |                              |
| Final R indices [I > 2σ(I)]       | $R_1 = 0.1217$ , $wR_2 = 0.3486$          |                              |
| R indices (all data)              | $R_1 = 0.2492$ , $wR_2 = 0.4245$          |                              |
| Absolute structure parameter      | 0.07(2)                                   |                              |
| Largest diff. peak and hole       | 2.090 and -0.946 e.Å <sup>-3</sup>        |                              |

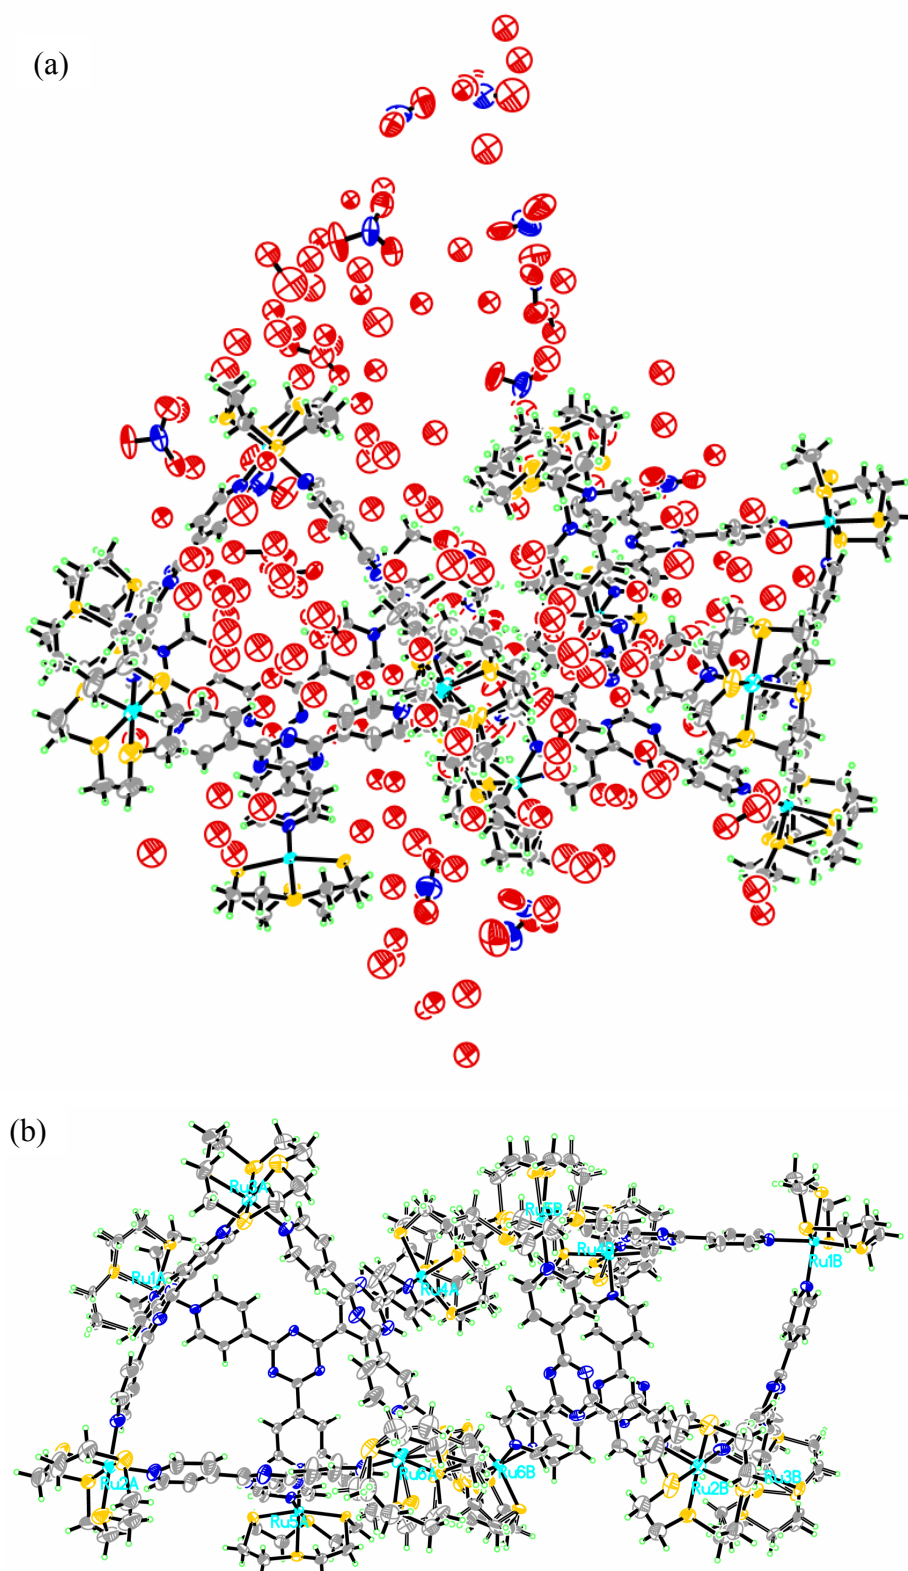

**Figure S2.** ORTEP views (30% probability level) of  $1 \cdot (\text{H}_2\text{O})_m$ : (a) Independent molecular structure. Water molecules and nitrate anions are severely disordered. (b) Molecules of **1**.

**Table 2.** Crystal data and structure refinement for  $[\mathbf{1}\cdot(\mathbf{6})_4]\cdot(\mathbf{5})\cdot(\mathbf{H}_2\mathbf{O})_m$ .

|                                   |                                             |                       |
|-----------------------------------|---------------------------------------------|-----------------------|
| Identification code               | cage1.6                                     |                       |
| Empirical formula                 | C178 H334.5 N37 O85.25 Ru6 S24              |                       |
| Formula weight                    | 5728.7                                      |                       |
| Temperature                       | 80(2) K                                     |                       |
| Wavelength                        | 0.71073 Å                                   |                       |
| Crystal system                    | Orthorhombic                                |                       |
| Space group                       | <i>Ccc2</i>                                 |                       |
| Unit cell dimensions              | $a = 37.576(5)$ Å                           | $\alpha = 90^\circ$ . |
|                                   | $b = 44.413(6)$ Å                           | $\beta = 90^\circ$ .  |
|                                   | $c = 35.800(5)$ Å                           | $\gamma = 90^\circ$ . |
| Volume                            | 59747(14) Å <sup>3</sup>                    |                       |
| Z                                 | 8                                           |                       |
| Density (calculated)              | 1.275 Mg/m <sup>3</sup>                     |                       |
| Absorption coefficient            | 0.539 mm <sup>-1</sup>                      |                       |
| F(000)                            | 23932                                       |                       |
| Crystal size                      | 0.16 x 0.09 x 0.06 mm <sup>3</sup>          |                       |
| Theta range for data collection   | 1.57 to 27.92°.                             |                       |
| Index ranges                      | -49 ≤ h ≤ 49, -58 ≤ k ≤ 57, -47 ≤ l ≤ 46    |                       |
| Reflections collected             | 344836                                      |                       |
| Independent reflections           | 71025 [R(int) = 0.0725]                     |                       |
| Completeness to theta = 27.92°    | 99.7 %                                      |                       |
| Absorption correction             | Semi-empirical                              |                       |
| Max. and min. transmission        | 0.9684 and 0.9187                           |                       |
| Refinement method                 | Full-matrix least-squares on F <sup>2</sup> |                       |
| Data / restraints / parameters    | 71025 / 1748 / 3564                         |                       |
| Goodness-of-fit on F <sup>2</sup> | 1.068                                       |                       |
| Final R indices [I > 2σ(I)]       | $R_1 = 0.0774$ , $wR_2 = 0.1919$            |                       |
| R indices (all data)              | $R_1 = 0.1470$ , $wR_2 = 0.2440$            |                       |
| Absolute structure parameter      | 0.07(2)                                     |                       |
| Largest diff. peak and hole       | 2.009 and -1.281 e.Å <sup>-3</sup>          |                       |

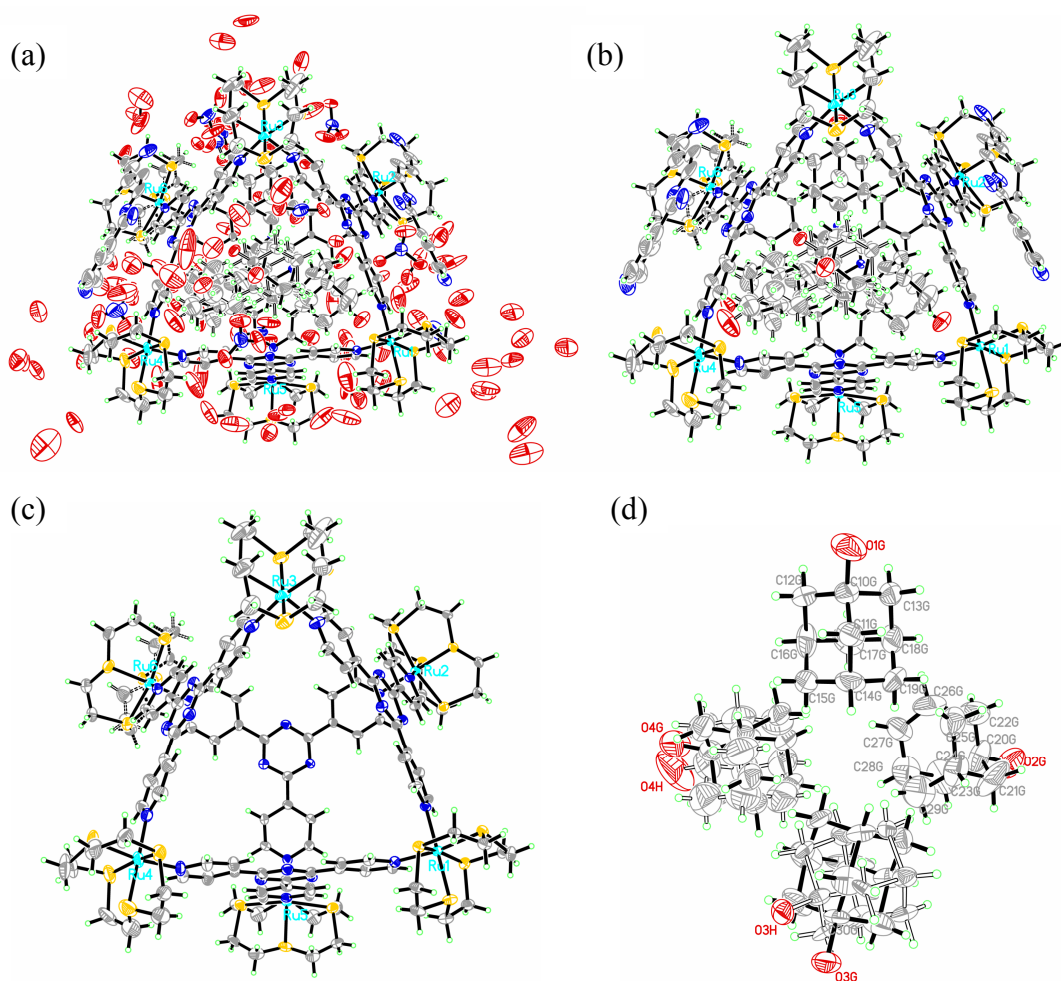

**Figure S3.** ORTEP views (30% probability level) of  $[1\cdot(6)_4]\cdot(5)\cdot(H_2O)_m$ : (a) Independent molecular structure. Water molecules and nitrate anions are severely disordered. (b) Molecule of  $[1\supset(6)_4]\cdot(5)$ . (c) Molecule of **1**. (d) Molecules of encapsulated **6**.



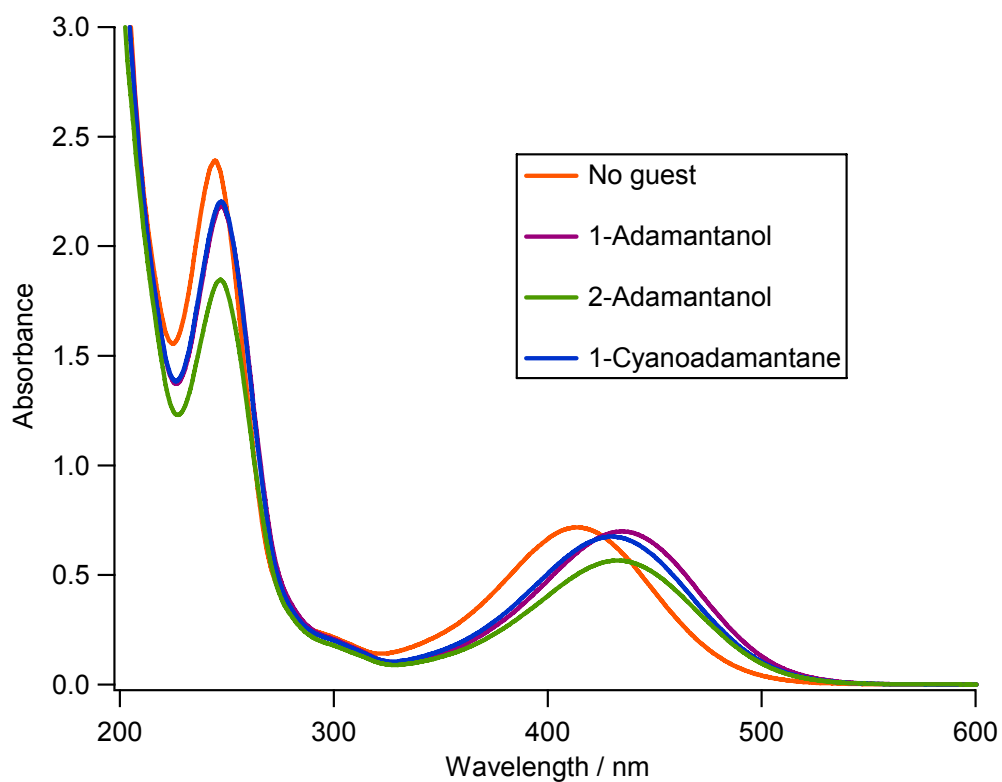

**Figure S4.** UV-Vis spectra of Ru(II)-cage **1** encapsulating adamantane derivatives (0.1 mM in H<sub>2</sub>O).
